# Supplementary material for: On the value of high density rain gauge observations for small Alpine headwater catchment hydrology
Source: Copernicus journal article supplement (doi:10.5194/hess-2020-371), 2020-08-03
Supplement: Supplementary file 1 [file events_data.xlsx]

## Sheet: introduction
On the value of high density rain gauge observations for small Alpine headwater catchment hydrology
Anthony Michelon1, Lionel Benoit1, Harsh Beria1, Natalie Ceperley1,2, Bettina Schaefli1,2
1 Institute of Earth Surface Dynamics (IDYST), Faculty of Geosciences and Environment, University of Lausanne, Lausanne, 1015, Switzerland
2 Now at: Institute of Geography (GIUB), Faculty of Science, University of Berne, Switzerland
Correspondence to: Anthony Michelon (anthony.michelon@unil.ch)
	The sheet data contains:
	1 ) For each rainfall event:
#	- the number of the rainfall event (#) from 1 to 48
Start date	- the start date of the rainfall event (format day/month/year hour:minutes), UTC
End date	- the end date of the rainfall event (format day/month/year hour:minutes), UTC
Duration	- the duration of the rainfall event (format hour:minutes)
Nb. of working WS	- The number of weather stations (out of 12) which recorded the rainfall event
	2 ) For each streamflow event:
#	- the number of the streamflow event (#) from 1 to 15
Start date	- the start date of the streamflow event (format day/month/year hour:minutes), UTC
End date	- the end date of the streamflow event (format day/month/year hour:minutes), UTC
Duration	- the duration of the streamflow event (format hour:minutes)
QINIT	- the specific discharge at the beginning of the streamflow event
QFAST	- the mean (mean), 95% of confidence interval (95% inf and 95% sup) of the fast streamflow amount
lag ΔP/Q	- the lag time between the first third of cumulated rainfall and the first third of cumulated river quickflow
	3 ) Computed using the stochastic interpolation method (section 3.2.1):
PALL	- The mean (mean) and standard deviation (std) of the amount of rainfall over the whole catchment
PNORTH	- The mean (mean) and standard deviation (std) of the amount of rainfall over the north part of the catchment
PSOUTH	- The mean (mean) and standard deviation (std) of the amount of rainfall over the south part of the catchment
IASYM	- The mean (mean) and standard deviation (std) of the index of spatial asymmetry of rainfall
Maximum of rainfall over 10 minutes	- The mean (mean) and extreme (min and max) values of the maximum of rainfall over 10 minutes, for:
	- the all catchment
	- the north part of the catchment
	- the south part of the catchment
DHILLS	- The mean distance (mean) and standard deviation (std) of rainfall spatial center of mass to stream network (along hillslopes), computed with:
	- the wet network
	- the dry network
	- the composite network
DSTREAM	- The mean distance (mean) and standard deviation (std) of rainfall spatial center of mass to outlet along the stream network, computed with:
	- the wet network
	- the dry network
	- the composite network
DHAND	- The mean distance (mean) and standard deviation (std) height above the nearest drainage, computed with:
	- the wet network
	- the dry network
	- the composite network
RC	- The mean (mean) and extreme (min and max) values of the runoff coefficient
	4 ) Computed using the Thiessen interpolation method (section 3.6):
PALL	- The amount of rainfall over the whole catchment
PNORTH	- The amount of rainfall over the north part of the catchment
PSOUTH	- The amount of rainfall over the south part of the catchment
IASYM	- The index of spatial asymmetry of rainfall
Maximum of rainfall over 10 minutes	- The maximum of rainfall over 10 minutes, for:
	- the all catchment
	- the north part of the catchment
	- the south part of the catchment
DHILLS	- The rainfall spatial center of mass to stream network (along hillslopes), computed with:
	- the wet network
	- the dry network
	- the composite network
DSTREAM	- The rainfall spatial center of mass to outlet along the stream network, computed with:
	- the wet network
	- the dry network
	- the composite network
DHAND	- The height above the nearest drainage, computed with:
	- the wet network
	- the dry network
	- the composite network
RC	- The runoff coefficient
	The grey area corresponds to rainfall events for which the streamflow reaction could not be measured (section 4.2.1)

## Sheet: data
RAINFALL EVENT					STREAMFLOW EVENT									STOCHASTIC INTERPOLATION METHOD
																						Maximum rainfall over 10 minutes [mm/h]									DHILLS [m]				DSTREAM [m]				DHAND [m]				DHILLS [m]		DSTREAM [m]		DHAND [m]
#	Start date	End date	Duration	Nb. of working WS	#	Start date	End date	Duration	QINIT [mm]	QFAST [mm]			lag ΔP/Q [min]	PALL [mm]		PNORTH [mm]		PSOUTH [mm]		IASYM [-]		all catchment			north part			south part			wet network		dry network		wet network		dry network		wet network		dry network		composite network		composite network		composite network		RC [-]
										95% inf	mean	95% sup		mean	std	mean	std	mean	std	mean	std	min	mean	max	min	mean	max	min	mean	max	mean	std	mean	std	mean	std	mean	std	mean	std	mean	std	mean	std	mean	std	mean	std	min
1	2018-07-02 16:42:00	2018-07-02 18:56:00	02:14:00	8										2.93764	0.245955	1.95973	0.143994	0.962729	0.127976	-0.341151	-0.0732789	2.12105	2.73562	3.17712	2.91322	4.5462	5.37915	2.6122	3.39001	5.17308	574.569	27.959	934.28	52.3802	3574.51	90.2647	3214.8	69.2336	288.803	16.4014	440.21	32.3402
2	2018-07-02 21:58:00	2018-07-02 22:40:00	00:42:00	8	1	2018-07-02 22:43:00	2018-07-02 23:27:00	00:44:00	7.9	0.846924	0.920096	0.986348	24	7.73491	1.02439	4.09983	0.642355	3.62871	0.541169	-0.0609587	-0.0186477	19.6649	25.6559	32.0312	21.6506	31.2635	43.1965	15.7372	21.1242	29.0927	925.147	67.3627	1521.21	112.986	4604.29	108.658	4008.22	79.5244	378.186	19.0002	610.63	39.689	1521.21	112.986	4008.22	79.5244	610.63	39.689	0.0984392
3	2018-07-03 04:50:00	2018-07-03 05:44:00	00:54:00	8										1.23913	0.12621	0.549567	0.0792954	0.690326	0.0657292	0.113526	0.0277545	1.56266	2.13181	2.66018	1.55501	2.05524	3.06259	1.83781	2.4479	2.81834	706.68	42.6795	1144.96	49.9494	4336.19	89.7806	3897.91	88.6718	310.472	13.1202	477.431	31.1918
4	2018-07-03 17:00:00	2018-07-03 17:40:00	00:40:00	8	2	2018-07-03 17:21:00	2018-07-03 19:36:00	02:15:00	7.5	7.96916	8.53899	9.11626	25	12.0532	2.05516	7.44599	1.33621	4.58559	0.881723	-0.237741	-0.0884295	39.157	49.2826	74.8915	49.7878	63.3304	99.511	23.8444	35.723	50.2293	816.751	59.5387	1335.63	78.8011	4360.97	136.112	3842.09	118.517	349.639	18.66	549.796	36.7026	1335.63	78.8011	3842.09	118.517	549.796	36.7026	0.563832
5	2018-07-05 04:28:00	2018-07-05 05:28:00	01:00:00	9										1.16097	0.0219031	0.443724	0.0160536	0.721591	0.0176166	0.238448	0.0147181	1.80307	1.94535	2.07809	1.26349	1.50285	1.64248	2.25285	2.4608	2.61053	863.467	26.6286	1331.26	31.9564	4485.06	44.4107	4017.27	38.8417	346.158	6.36231	522.109	8.76699
6	2018-07-05 09:38:00	2018-07-05 12:08:00	02:30:00	9										1.61877	0.132023	0.660959	0.0679134	0.960366	0.0857964	0.184668	0.0355587	3.06288	3.99328	4.8347	1.4552	2.02423	2.93896	4.50326	6.02247	7.50129	654.507	47.5524	1076.87	92.8504	3628.86	158.128	3206.5	102.424	325.887	20.6125	497.189	47.1242
7	2018-07-05 13:48:00	2018-07-05 17:32:00	03:44:00	9	3	2018-07-05 16:33:00	2018-07-05 21:42:00	05:09:00	6	5.53964	6.04008	6.53846	75	8.1779	0.287357	3.96951	0.150187	4.21056	0.187583	0.029468	0.00243579	6.5827	7.46346	8.42983	7.4419	8.5962	9.844	8.22527	9.46098	11.6191	754.714	25.9412	1286.75	37.0253	4374.14	61.0264	3842.1	54.6679	349.744	9.34772	557.324	16.226	754.714	25.9412	4374.14	61.0264	349.744	9.34772	0.661858
8	2018-07-06 01:14:00	2018-07-06 03:36:00	02:22:00	9										1.46409	0.0482228	0.308236	0.0205203	1.16766	0.0374957	0.582306	0.060868	1.19351	1.42652	1.61769	0.607333	0.830145	1.15387	2.2701	2.66586	3.06005	983.382	33.2765	1524.23	40.895	5013.66	33.4331	4472.8	33.6171	381.572	5.68554	578.591	9.92414
9	2018-07-06 05:38:00	2018-07-06 13:36:00	07:58:00	9	4	2018-07-06 06:55:00	2018-07-06 16:42:00	09:47:00	5.8	24.1553	25.9073	27.9257	80	20.1527	0.492107	8.6315	0.276887	11.5675	0.255284	0.145351	0.0080038	8.02687	9.4076	10.2611	9.37118	10.7758	12.1055	8.12357	8.76213	10.6805	874.045	17.9391	1352.16	17.3737	4450.32	31.9159	3972.2	33.6604	354.882	3.58675	535.59	6.90379	874.045	17.9391	4450.32	31.9159	354.882	3.58675	1.16935
10	2018-07-14 15:00:00	2018-07-14 20:58:00	05:58:00	11	5	2018-07-14 16:51:00	2018-07-14 21:53:00	05:02:00	4.5	12.0779	12.8999	13.9083	47	18.7247	0.953527	10.4811	0.507454	8.2205	0.585386	-0.120875	-0.0147201	14.16	15.7	18.2493	22.7336	25.8491	28.8327	10.3238	14.0702	17.2607	736.443	31.8821	1262.61	62.1862	4100.41	122.639	3574.25	89.6804	345.075	11.8798	554.474	25.7927	1262.61	62.1862	3574.25	89.6804	554.474	25.7927	0.606747
11	2018-07-15 17:42:00	2018-07-15 19:58:00	02:16:00	11	6	2018-07-15 18:20:00	2018-07-15 23:01:00	04:41:00	5.5	8.87863	9.52881	10.1775	42	10.7137	0.683591	6.03144	0.43019	4.66492	0.297725	-0.127756	-0.0172924	31.7409	37.1181	42.1489	32.728	39.5687	45.9861	30.752	35.2443	39.237	628.013	27.9778	1122.02	45.3639	3870.81	82.7342	3376.8	74.2842	326.096	9.03505	528.192	27.8497	1122.02	45.3639	3376.8	74.2842	528.192	27.8497	0.787264
12	2018-07-19 01:26:00	2018-07-19 03:10:00	01:44:00	11										2.99588	0.30364	1.69486	0.191404	1.30467	0.178767	-0.130085	-0.0326658	4.23907	5.20176	6.00484	4.63555	6.20166	8.30076	3.67177	4.65663	5.80974	713.624	27.9778	1213.12	82.2257	4202.93	166.056	3703.43	147.663	320.303	21.639	516.018	54.2444
13	2018-07-20 17:40:00	2018-07-20 22:28:00	04:48:00	8	7	2018-07-20 19:01:00	2018-07-20 22:49:00	03:48:00	4.8	13.3576	14.2495	15.1577	53	18.7542	0.28091	8.55672	0.208578	10.215	0.229579	0.0883403	0.0041422	25.9506	27.1752	28.5715	24.7987	26.9965	28.1323	25.5028	28.1567	31.4303	757.783	12.4624	1282.35	12.6916	4347.65	28.4305	3823.08	29.8374	335.67	2.8261	540.681	4.45217	1282.35	12.6916	3823.08	29.8374	540.681	4.45217	0.698294
14	2018-07-21 10:46:00	2018-07-21 12:00:00	01:14:00	11										1.07015	0.0439712	0.510221	0.0379524	0.563328	0.0298223	0.0494692	0.0063873	1.24397	1.46636	1.79127	1.30039	1.68735	1.9767	1.73736	2.01998	2.56557	733.835	29.5973	1191.87	40.3684	4285.05	48.5616	3827.02	47.9637	321.933	8.04979	502.86	18.8233
15	2018-07-21 16:06:00	2018-07-21 17:42:00	01:36:00	11										1.63325	0.105327	0.679708	0.0479404	0.957889	0.0712897	0.169872	0.0246326	1.77525	2.07236	2.32719	1.18465	1.63429	2.07949	2.39639	2.69352	3.27228	767.626	29.724	1226.88	45.7056	4360.32	85.6302	3901.07	65.0364	326.941	10.3016	503.935	23.1498
16	2018-07-24 18:32:00	2018-07-24 22:12:00	03:40:00	12	8	2018-07-24 20:07:00	2018-07-24 23:56:00	03:49:00	3.1	28.2981	30.4222	32.4779	23	8.04384	1.33062	7.54664	1.15919	0.454809	0.236652	-0.886318	-0.680032	6.991	9.70532	14.6611	13.8952	18.3741	26.4361	0.306034	1.65189	4.44474	442.905	52.7507	739.859	140.252	2480.74	231.719	2183.78	154.132	278.246	46.4372	418.642	92.7064	739.859	140.252	2183.78	154.132	418.642	92.7064	3.02122
17	2018-07-28 05:18:00	2018-07-28 06:16:00	00:58:00	12										4.34564	0.564571	2.11973	0.337501	2.2233	0.30675	0.0238487	0.00710567	8.35664	10.3446	12.5946	8.16785	10.3651	15.0937	7.79594	10.4886	13.949	771.613	55.6692	1303.57	67.8216	4244.59	140.426	3712.63	114.84	348.694	16.576	561.604	40.3097
18	2018-07-28 10:02:00	2018-07-28 14:06:00	04:04:00	12										6.78376	0.242088	3.61218	0.130278	3.16502	0.121435	-0.0659804	-0.00491355	6.86231	7.3616	8.15469	7.58083	8.09016	9.11217	6.94083	7.49309	8.56511	729.283	20.4276	1222.16	28.2662	4107.4	52.9685	3614.52	41.7021	338.368	7.57536	538.196	18.5446
19	2018-08-01 15:34:00	2018-08-01 19:50:00	04:16:00	10										5.04175	0.388772	2.52345	0.213378	2.52093	0.23116	-0.000499447	-8.81019e-05	5.29398	6.59393	7.68232	6.43904	7.77673	9.39174	4.77782	6.09933	7.75917	765.866	42.6799	1256.57	50.3973	4060.65	97.3329	3569.94	79.8487	343.719	11.6804	541.792	21.0153
20	2018-08-03 15:18:00	2018-08-03 16:26:00	01:08:00	12										1.21249	0.0970087	0.867059	0.0490188	0.33846	0.0645345	-0.438483	-0.123325	2.39173	2.81932	3.15931	3.76982	4.13293	4.58327	1.04924	1.58419	2.13928	574.29	38.4526	887.677	58.2302	3137.52	130.732	2824.13	94.7007	299.626	14.673	432.442	29.2064
21	2018-08-05 14:56:00	2018-08-05 15:28:00	00:32:00	12										0.92978	0.255228	0.72877	0.192478	0.195779	0.0885178	-0.576488	-0.426896	2.08712	3.00487	4.94502	4.06873	5.69098	9.14277	0.635861	1.3212	2.70473	500.704	59.2665	855.405	126.42	3478.92	181.47	3124.22	132.66	260.463	34.1119	406.226	82.2055
22	2018-08-06 16:36:00	2018-08-06 19:44:00	03:08:00	9										43.4592	2.57747	21.0138	1.13331	22.4461	2.06959	0.0329564	0.00497847	67.0403	77.2211	91.8034	74.8876	83.0437	97.9343	57.4479	72.2285	88.7735	728.818	35.2041	1251.71	52.7742	4409.89	91.4653	3886.99	94.7285	331.097	9.40442	535.737	23.8675
23	2018-08-08 14:32:00	2018-08-08 15:04:00	00:32:00	12										1.89225	0.56674	1.77383	0.487924	0.0874526	0.0734789	-0.90603	-1.13281	3.17696	6.36917	10.3757	6.20323	12.4903	20.2146	0.104382	0.576742	2.44612	491.676	59.3843	686.322	141.608	2196.96	278.975	2002.31	191.156	269.172	39.2239	358.384	91.0698
24	2018-08-09 11:40:00	2018-08-09 13:54:00	02:14:00	12										2.27155	0.156726	1.21539	0.0790692	1.05535	0.109066	-0.0704831	-0.0121725	3.71383	4.40271	4.9994	4.29411	4.96758	5.40259	3.29525	4.07191	4.99404	692.522	66.1859	1160.84	92.6458	4030.64	152.37	3562.32	134.289	321.336	20.9597	510.466	41.0969
25	2018-08-09 22:12:00	2018-08-09 23:24:00	01:12:00	12										1.50124	0.026247	0.694523	0.0137721	0.808404	0.0166633	0.0757729	0.00306499	2.1445	2.26273	2.41583	2.18975	2.31335	2.4571	2.09029	2.21403	2.38278	759.445	10.2033	1236.73	13.7325	4352.13	19.0107	3874.85	14.1631	330.421	2.21155	513.218	5.74646
26	2018-08-10 02:30:00	2018-08-10 06:36:00	04:06:00	12										3.68838	0.0705722	1.80275	0.030776	1.88691	0.0493844	0.0228086	0.00100794	4.03009	4.31418	4.53307	5.11598	5.51313	5.90363	2.78974	3.11462	3.35235	691.32	12.7601	1176.75	18.7642	4370.63	27.013	3885.2	20.776	315.391	3.68661	503.744	7.17666
27	2018-08-13 07:52:00	2018-08-13 09:38:00	01:46:00	11										2.87014	0.340017	1.72128	0.224214	1.14033	0.150324	-0.203017	-0.0532087	3.24249	4.09962	5.11671	3.45174	5.07344	6.40524	2.45203	3.16161	4.07142	677.673	64.0736	1170.53	96.3336	4065.85	102.023	3572.99	112.317	327.865	25.361	527.096	52.1485
28	2018-08-13 14:08:00	2018-08-13 15:06:00	00:58:00	12										2.8998	0.131078	0.961527	0.053366	1.951	0.0853705	0.339731	0.0339564	4.21821	4.72998	5.22441	4.0494	4.46986	5.07147	7.05766	8.08823	8.99058	785.613	12.179	1396.73	18.6226	4659.32	41.2067	4048.21	33.1705	349.761	3.87661	585.97	8.27701
29	2018-08-14 02:16:00	2018-08-14 05:40:00	03:24:00	12	9	2018-08-14 03:46:00	2018-08-14 06:18:00	02:32:00	4	7.29337	7.8117	8.31324	50	11.0891	0.673479	4.04843	0.305916	7.08116	0.564386	0.272493	0.0423241	13.3668	16.7678	19.7626	13.1276	14.8208	20.6709	16.5474	19.9038	23.4833	784.471	50.8938	1286.28	68.8953	4806.48	99.808	4304.67	90.9772	353.536	11.8027	540.037	23.555	1286.28	68.8953	4304.67	90.9772	540.037	23.555	0.620555
30	2018-08-14 12:54:00	2018-08-14 14:28:00	01:34:00	12										1.51333	0.0918271	0.8851	0.0694465	0.623136	0.0294019	-0.173689	-0.0224893	2.27683	2.65447	3.17809	2.85326	3.36765	4.10767	1.74848	2.01225	2.25371	662.643	25.8545	1108.9	47.7455	3630.07	74.5925	3183.82	63.71	328.255	13.3981	518.009	24.6731
31	2018-08-17 12:04:00	2018-08-17 14:36:00	02:32:00	12	10	2018-08-17 13:53:00	2018-08-17 15:42:00	01:49:00	3.2	4.58135	4.94738	5.29511	37	11.9092	1.01777	6.20555	0.560315	5.70324	0.709591	-0.0421791	-0.00917002	8.06919	10.644	13.3177	10.4362	12.504	15.7355	6.62514	10.1711	14.1808	662.148	42.5641	1122.03	52.9835	4239.65	105.37	3779.77	107.306	312.539	12.9727	490.186	27.6983	1122.03	52.9835	3779.77	107.306	490.186	27.6983	0.354359
32	2018-08-19 15:22:00	2018-08-19 16:00:00	00:38:00	12										2.29861	0.317892	0.713069	0.177401	1.5966	0.265927	0.382535	0.161967	5.21033	7.02572	9.48694	1.28253	3.94218	5.9382	7.17778	11.1438	14.5361	977.076	146.953	1458.49	237.221	4013.24	364.573	3531.82	284.764	386.396	47.6135	570.458	87.1947
33	2018-08-22 19:10:00	2018-08-22 20:42:00	01:32:00	12										3.19522	0.247552	1.47582	0.123956	1.72274	0.177003	0.0771974	0.014488	3.44568	3.88805	4.6966	3.0422	4.02386	5.1825	3.02244	4.04736	4.83887	757.506	51.2701	1314.78	47.9268	4509.47	85.7638	3952.19	89.7257	339.306	9.64642	552.842	23.6674
34	2018-08-23 16:26:00	2018-08-23 22:54:00	06:28:00	12	11	2018-08-23 18:32:00	2018-08-23 22:29:00	03:57:00	2.4	12.4997	13.4741	14.3815	34	22.0773	0.587632	8.81043	0.326954	13.3344	0.485484	0.204291	0.0150198	18.4417	20.4022	24.7017	21.0922	25.3035	30.0091	29.3661	34.6157	37.1113	853.509	21.4667	1370.61	33.6095	4272.86	70.0111	3755.76	57.0473	362.397	5.0843	563.094	8.91774	1370.61	33.6095	3755.76	57.0473	563.094	8.91774	0.552924
35	2018-08-24 02:46:00	2018-08-24 05:24:00	02:38:00	12	12	2018-08-24 04:10:00	2018-08-24 05:57:00	01:47:00	4.1	6.09999	6.54109	6.97977	44	8.07059	0.13461	4.3516	0.0856373	3.71026	0.0971824	-0.0795519	-0.00368584	11.0882	11.9024	12.5397	11.9642	12.7281	13.5229	10.0776	11.2001	11.9669	692.395	15.0804	1155.49	15.9941	4114.19	39.9607	3651.09	35.6132	319.561	3.65483	503.019	5.00438	692.395	15.0804	4114.19	39.9607	319.561	3.65483	0.737935
36	2018-08-25 10:22:00	2018-08-25 11:24:00	01:02:00	12										1.17709	0.0638046	0.408783	0.0262562	0.774102	0.0600151	0.308837	0.0439727	1.59103	1.7742	2.11973	1.06635	1.35157	1.67678	1.87749	2.21945	2.79913	761.052	30.7978	1272.25	38.0721	4666.86	70.6849	4155.67	57.6132	327.151	8.33824	518.648	14.3213
37	2018-08-25 13:26:00	2018-08-25 16:20:00	02:54:00	12										3.00442	0.255741	1.37194	0.109993	1.64068	0.174472	0.0892059	0.0168011	1.41157	1.80733	2.2519	1.17736	1.70307	2.12406	1.55152	2.03715	2.4844	714.549	29.0372	1164.62	52.251	4296.44	94.2528	3846.38	73.4956	316.487	12.4124	488.903	27.6131
38	2018-08-25 18:58:00	2018-08-25 21:16:00	02:18:00	12										2.55205	0.239086	1.47493	0.123956	1.0744	0.170709	-0.157111	-0.0399372	1.84766	2.40773	2.89803	2.316	3.03245	4.05575	1.49264	2.05112	2.51147	496.852	25.4266	916.896	60.579	3983.17	144.305	3563.13	116.696	259.847	16.2806	426.892	37.1977
39	2018-08-26 08:02:00	2018-08-26 10:06:00	02:04:00	12										0.790411	0.128063	0.069234	0.0231881	0.727571	0.12746	0.826221	0.441645	0.370081	0.574267	0.745633	0.0597795	0.165936	0.38498	0.689368	1.05185	1.4503	1250.7	135.084	1881.15	156.813	5313.77	117.875	4683.31	99.6179	438.783	29.6821	664.114	35.1003
40	2018-08-29 11:52:00	2018-08-29 13:06:00	01:14:00	12										7.84519	0.433548	4.21359	0.281258	3.6209	0.220705	-0.0756508	-0.00967081	10.8103	13.7619	16.3736	12.3922	14.6381	17.3106	10.2416	13.5733	16.1368	710.267	22.107	1107.07	30.9647	3822.17	74.7891	3425.37	67.7682	317.306	5.13387	473.575	13.6273
41	2018-08-29 17:32:00	2018-08-29 18:44:00	01:12:00	12	13	2018-08-29 18:38:00	2018-08-29 20:34:00	01:56:00	3	2.14342	2.29584	2.48977	53	4.79855	0.245516	2.22675	0.124697	2.58128	0.14556	0.0737367	0.00828736	17.1963	18.9118	21.3538	13.0547	16.0805	18.393	19.9682	22.2692	24.9135	739.349	17.5353	1207.47	24.6827	3994.5	60.8415	3526.38	49.8664	335.737	6.09452	524.181	12.348	1207.47	24.6827	3526.38	49.8664	524.181	12.348	0.420441
42	2018-08-31 15:46:00	2018-08-31 19:16:00	03:30:00	11										3.39122	0.205506	1.38774	0.107843	2.01309	0.13187	0.183882	0.0264307	2.16184	2.53305	2.95042	1.44742	1.86942	2.17565	2.66508	3.22222	3.97091	761.899	32.0342	1237.93	46.0297	4467.86	60.7991	3991.83	57.3662	325.078	9.72713	504.923	18.8007
43	2018-09-01 05:36:00	2018-09-01 16:04:00	10:28:00	11	14	2018-09-01 11:49:00	2018-09-01 17:30:00	05:41:00	3.4	15.2989	16.3911	17.5897	66	11.4127	0.3151	4.29663	0.197489	7.15531	0.173834	0.249624	0.0183534	2.53654	3.10747	3.49624	2.06303	2.42389	2.85971	3.47806	4.15914	4.64069	724.606	14.2981	1271.32	20.727	4487.22	36.7892	3940.5	38.9369	331.318	3.72293	544.897	9.91263	724.606	14.2981	4487.22	36.7892	331.318	3.72293	1.30137
44	2018-09-06 22:58:00	2018-09-07 02:54:00	03:56:00	11										4.21208	0.128602	2.05405	0.0669646	2.15901	0.121792	0.0249149	0.0022957	3.45615	3.99547	4.52953	4.1548	4.5001	4.96824	2.89104	3.64297	4.27075	769.191	22.5208	1252.63	32.3006	4355.74	58.0395	3872.3	56.3891	333.884	6.85464	521.815	14.3384
45	2018-09-13 14:54:00	2018-09-13 21:04:00	06:10:00	11	15	2018-09-13 20:39:00	2018-09-13 21:38:00	00:59:00	2.6	4.06868	4.35425	4.66253	32	10.8999	0.3954	7.03947	0.2247	3.84222	0.203715	-0.29382	-0.0257156	11.516	12.3296	13.5025	18.903	19.9667	21.5511	4.8151	5.53326	6.77093	781.534	26.9101	1290.76	41.0123	4102.89	61.0909	3593.66	45.8915	351.715	7.68887	556.232	13.4693	1290.76	41.0123	3593.66	45.8915	556.232	13.4693	0.357926
46	2018-09-14 00:42:00	2018-09-14 02:00:00	01:18:00	11										1.77093	0.044372	1.11137	0.0333138	0.65522	0.0218643	-0.258211	-0.0163798	4.08019	4.41364	4.68483	5.24589	5.74896	6.21825	2.91423	3.24125	3.60709	765.767	24.5267	1281.48	36.2145	4136.27	64.7162	3620.56	55.1898	337.508	4.89822	542.339	11.0451
47	2018-09-18 18:04:00	2018-09-18 20:18:00	02:14:00	11										2.44044	0.205509	1.15571	0.116551	1.28595	0.120771	0.0533391	0.0103951	3.07079	3.5644	4.64735	3.72902	4.51885	6.12432	2.76494	3.33163	4.0811	819.134	36.911	1349.86	47.7369	4520.01	93.567	3989.28	84.6112	340.56	12.3205	542.75	23.0873
48	2018-09-21 14:24:00	2018-09-21 23:20:00	08:56:00	7										7.96355	0.195308	4.46417	0.135016	3.4832	0.0878238	-0.123433	-0.00687345	6.80402	7.51914	7.9458	7.25798	8.2624	8.69765	6.42117	7.04542	7.55771	731.874	18.5909	1187.37	21.9655	4037.14	61.8553	3581.64	55.5062	332.904	5.13016	510.663	7.96418
[truncated: 16 more columns]
