# Supplementary material for: On the value of high density rain gauge observations for small Alpine headwater catchment hydrology
Source: Copernicus journal article supplement (doi:10.5194/hess-2020-371), 2020-08-03
Supplement: Supplementary file 1 [file hess-2020-371-supplement.zip]

Archive with 3 entries (3 files):
- events_data.xlsx
- Supplementary material Part 1.pdf
- Supplementary material Part 2.pdf
